# Supplementary material
Source: PubMed Central journal article supplement (PMC2784196)
Supplement: NIHMS151364-supplement-01.pdf [file NIHMS151364-supplement-01.pdf]

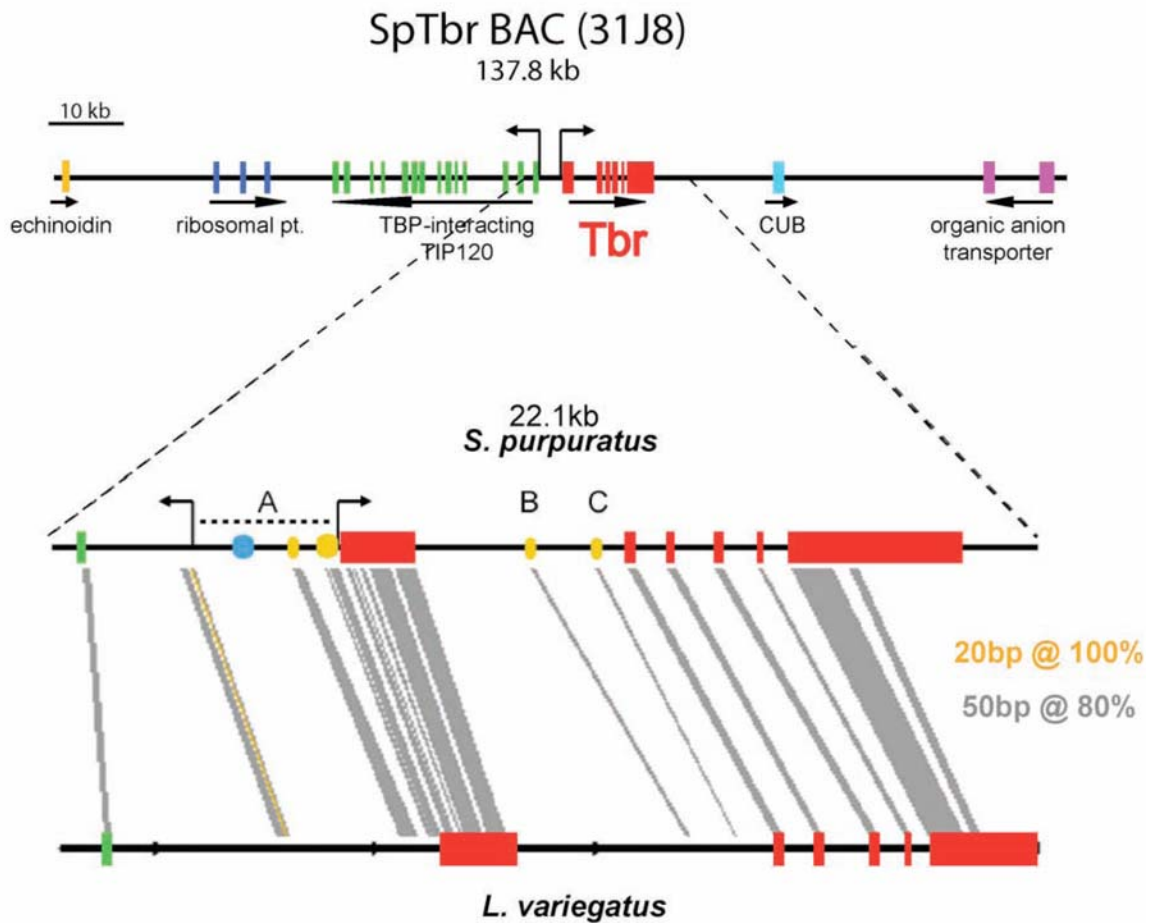

**Supplementary Figure 1. Genomic sequence alignment between *S. purpuratus* and *L. variegatus*.** The interspecific sequence comparison was done using FamilyRelationsII (see Materials and methods). The *tbrain* basal promoter and  $\alpha$  region, and the predicted B and C regulatory modules, but not the  $\gamma(2)$  module (blue oval), are conserved at the criteria used. The B and C modules were identified from sequence alignment (Ochiai et al., 2008), while  $\gamma(2)$  was identified through sequential deletion from a reporter construct driven by the region denoted “A”. A conserved region in “A” containing trimeric repeats (yellow oval right of  $\gamma(2)$ ) was not found to have regulatory function (data not shown).

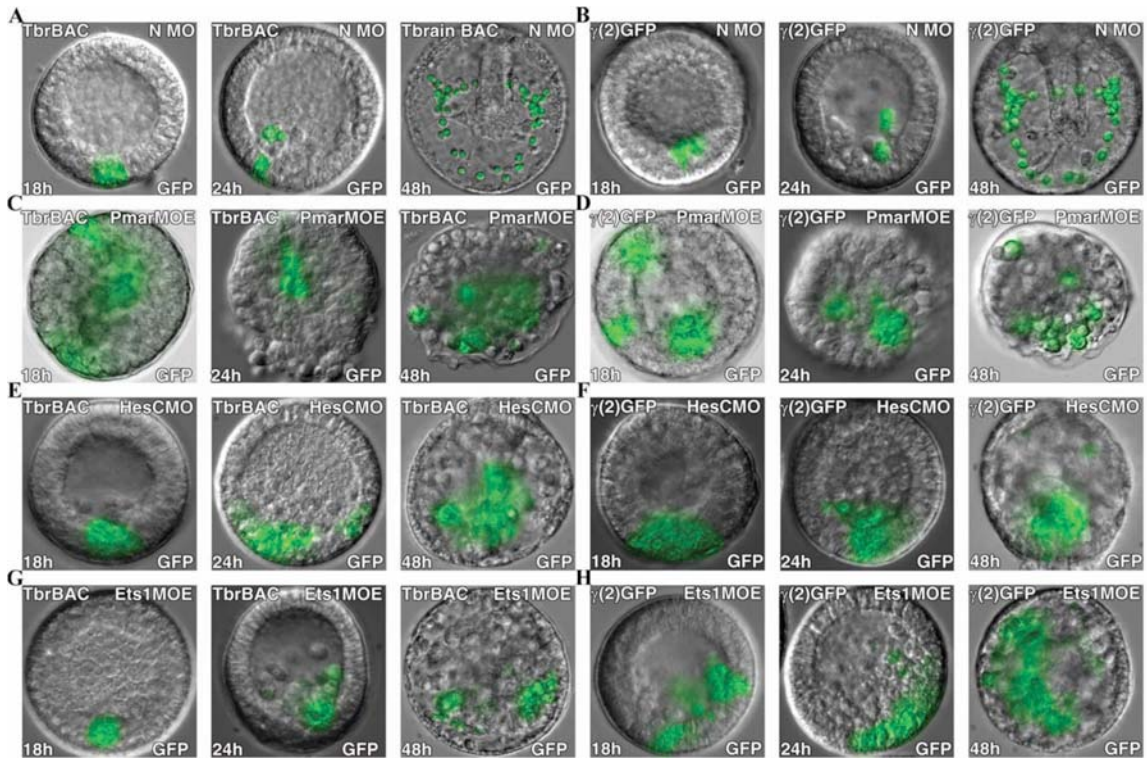

**Supplementary Figure 2. Responses of *tbr::GFP* BAC and  $\gamma(2)::EpGFP$  to upstream perturbations.** (A,C,E,G), *tbr::GFP* BAC; (B,D,F,H),  $\gamma(2)::EpGFP$ ; times indicated in each panel. (A,B), Control (randomized) MASO (N MO); (C,D) global overexpression of *pmar1* mRNA (MOE); (E,F), *hesC* MASO (MO); (G,H), *ets* MOE. All views are lateral except where ectopic mesenchymal transition has obscured embryonic axes. Scoring data are tabulated in Supplementary Table 1.

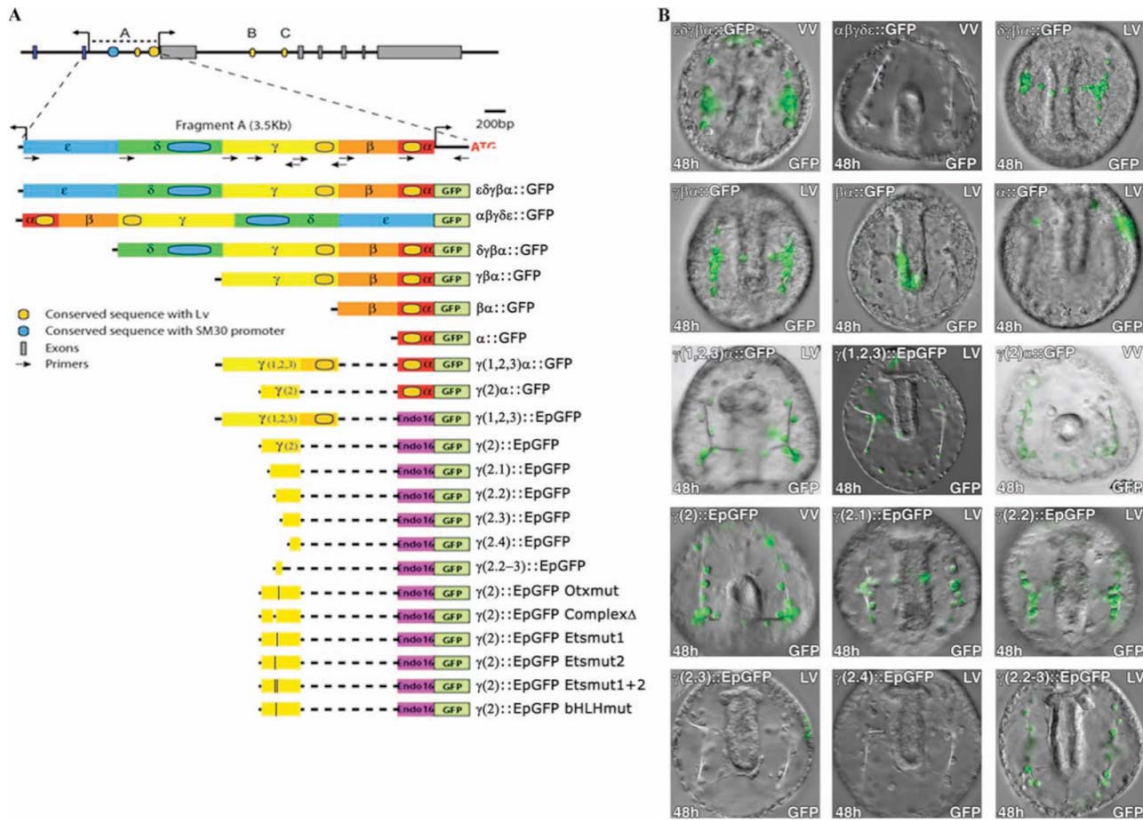

**Supplementary Figure 3. Isolation and functional characterization of  $\gamma(2)$  module.** (A) Deletions, constructs and mutations; (B) Typical results of injection of indicated constructs; quantitative scoring data are tabulated in Supplementary Tables 2 and 3. The  $\gamma(2)$  module was identified through successive deletions of a reporter containing the entire 5' *tbrain* intergenic region (Fragment “A”, top). Fragment A produced PMC-specific reporter expression in the sense orientation but had no transcriptional activation activity in the antisense orientation, indicating that it lacked regulatory function for the nearby upstream gene (see Fig. S1). Constructs including the  $\gamma$  region drove SM-specific GFP expression, so fragments of this region were examined for regulatory activity. Reporters were constructed using the basal promoter (Ep) of *endo16* (Yuh et al., 1996). We found that  $\gamma(2)$ , and at lower levels  $\gamma(2.2-3)$ , drove SM-specific GFP expression.

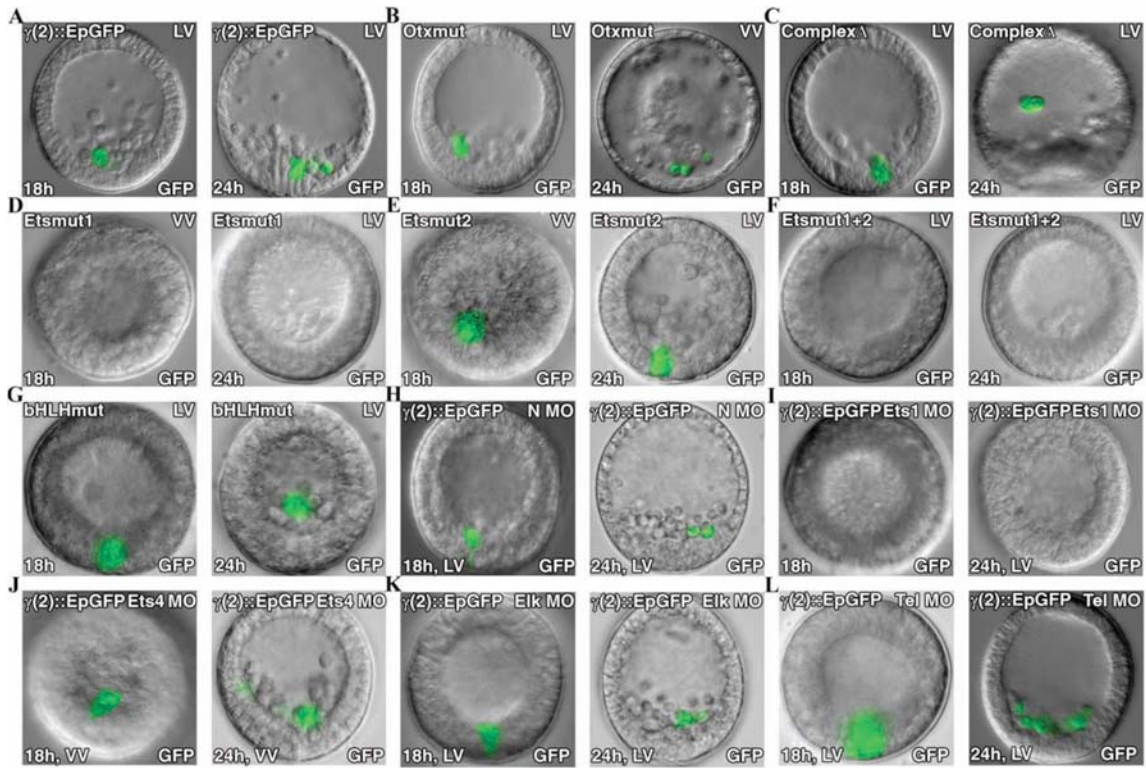

**Supplementary Figure 4. Cis-regulatory analysis of  $\gamma(2)::EpGFP$ .** (A, H-L), intact  $\gamma(2)::EpGFP$ ; (B-G), mutated derivatives of  $\gamma(2)::EpGFP$ . Observations were at 18 and 24hpf as indicated; VV, vegetal view, LV, lateral view. See Fig. S3A and text Fig. 7 for mutations. Representative embryos are reproduced; scoring data are tabulated in Supplementary Table 3. (A), control; (B), Otx site mutation; (C), Mutation of 31bp region forming gel shift complex; (D), Ets1/2 site 1 mutation; (E), Ets1/2 site 2 mutation; (F), mutation of both Ets1/2 sites; (H), Control randomized MASO; (I), *ets1/2* MASO; (J), *ets4* MASO; (K), *elk* MASO; (L), *tel* MASO.

Supplemental Table 1. Response of Tbrain reporter constructs to perturbation of the Pmar-HesC double negative PMC specification gate

| Stage                     | Construct          | Perturbation | Total embryos scored | GFP+ embryos (% of total) |      |         | Embryos misexpressing GFP (% of GFP+) |       |         |
|---------------------------|--------------------|--------------|----------------------|---------------------------|------|---------|---------------------------------------|-------|---------|
|                           |                    |              |                      | #                         | %    | SEM (%) | #                                     | %     | SEM (%) |
| Blastula (18h)            | Tbrain BAC GFP     | —            | 110                  | 26                        | 23.6 | 9.0     | 0                                     | 0.0   | 6.0     |
|                           |                    | Random MO    | 342                  | 191                       | 55.8 | 18.4    | 1                                     | 0.5   | 0.6     |
|                           |                    | Pmar1 MOE    | 110                  | 88                        | 80.0 | 11.4    | 30                                    | 34.1  | 12.4    |
|                           |                    | HesC MO      | 406                  | 334                       | 82.3 | 4.6     | 31                                    | 9.3   | 0.4     |
|                           |                    | Ets1/2 MOE   | 366                  | 255                       | 69.7 | 8.2     | 5                                     | 2.0   | 0.9     |
|                           | $\gamma(2)::EpGFP$ | —            | 186                  | 45                        | 24.2 | 18.7    | 6                                     | 13.3  | 7.2     |
|                           |                    | Random MO    | 334                  | 144                       | 43.1 | 23.7    | 2                                     | 1.4   | 1.5     |
|                           |                    | Pmar1 MOE    | 93                   | 74                        | 79.6 | 14.8    | 33                                    | 44.6  | 2.5     |
|                           |                    | HesC MO      | 339                  | 258                       | 76.1 | 11.2    | 18                                    | 7.0   | 6.4     |
|                           |                    | Ets1/2 MOE   | 286                  | 216                       | 75.5 | 9.9     | 65                                    | 30.1  | 36.2    |
| Mesenchyme blastula (24h) | Tbrain BAC GFP     | —            | 186                  | 79                        | 42.5 | 9.8     | 7                                     | 8.9   | 13.3    |
|                           |                    | Random MO    | 617                  | 483                       | 78.3 | 3.3     | 15                                    | 3.1   | 0.4     |
|                           |                    | Pmar1 MOE    | 93                   | 79                        | 84.9 | 9.6     | 39                                    | 49.4  | 9.4     |
|                           |                    | HesC MO      | 553                  | 407                       | 73.6 | 7.1     | 98                                    | 24.1  | 3.4     |
|                           |                    | Ets1/2 MOE   | 104                  | 98                        | 94.2 | 0.1     | 70                                    | 71.4  | 15.5    |
|                           | $\gamma(2)::EpGFP$ | —            | 185                  | 59                        | 31.9 | 11.2    | 2                                     | 3.4   | 14.3    |
|                           |                    | Random MO    | 244                  | 129                       | 52.9 | 9.2     | 4                                     | 3.1   | 2.1     |
|                           |                    | Pmar1 MOE    | 96                   | 80                        | 83.3 | 7.2     | 36                                    | 45.0  | 16.8    |
|                           |                    | HesC MO      | 173                  | 148                       | 85.5 | 10.1    | 63                                    | 42.6  | 4.4     |
|                           |                    | Ets1/2 MOE   | 303                  | 280                       | 92.4 | 0.2     | 265                                   | 94.6  | 2.6     |
| Late gastrula (48h)       | Tbrain BAC GFP     | Random MO    | 124                  | 96                        | 77.4 | 11.4    | 7                                     | 7.3   | 1.0     |
|                           |                    | HesC MO      | 90                   | 77                        | 85.6 | 5.3     | 77                                    | 100.0 | 0.0     |
|                           |                    | Ets1/2 MOE   | 53                   | 41                        | 77.4 | 2.4     | 41                                    | 100.0 | 0.0     |
|                           | $\gamma(2)::EpGFP$ | Random MO    | 133                  | 108                       | 81.2 | 6.8     | 14                                    | 13.0  | 2.9     |
|                           |                    | HesC MO      | 90                   | 83                        | 92.2 | 9.1     | 83                                    | 100.0 | 0.0     |
|                           |                    | Ets1/2 MOE   | 86                   | 80                        | 93.0 | 6.8     | 79                                    | 98.8  | 1.3     |

Supplemental Table 2. Identification of  $\gamma$  (2) *cis*-regulatory module in the Tbrain 5' intergenic region through serial deletion

| Stage                     | Construct                                     | Total embryos scored | GFP+ embryos (% of total) |      |         | Embryos misexpressing GFP (% of GFP+) |      |         |
|---------------------------|-----------------------------------------------|----------------------|---------------------------|------|---------|---------------------------------------|------|---------|
|                           |                                               |                      | #                         | %    | SEM (%) | #                                     | %    | SEM (%) |
| Mesenchyme blastula (24h) | $\epsilon\delta\gamma\beta\alpha::\text{GFP}$ | 411                  | 137                       | 33.3 | 17.5    | 42                                    | 30.7 | 5.9     |
|                           | $\alpha\beta\gamma\delta\epsilon::\text{GFP}$ | 82                   | 11                        | 13.4 | 0.8     | 6                                     | 54.5 | 1.7     |
|                           | $\delta\gamma\beta\alpha::\text{GFP}$         | 177                  | 50                        | 28.2 | 20.7    | 21                                    | 42.0 | 18.8    |
|                           | $\gamma\beta\alpha::\text{GFP}$               | 149                  | 113                       | 75.8 | 8.0     | 39                                    | 34.5 | 7.4     |
|                           | $\beta\alpha::\text{GFP}$                     | 134                  | 108                       | 80.6 | 19.4    | 35                                    | 32.4 | 2.7     |
|                           | $\alpha::\text{GFP}$                          | 98                   | 54                        | 55.1 | 18.3    | 21                                    | 38.9 | 3.0     |
|                           | $\gamma(1,2,3)\alpha::\text{GFP}$             | 210                  | 93                        | 44.3 | 18.9    | 12                                    | 12.9 | 3.8     |
|                           | $\gamma(2)\alpha::\text{GFP}$                 | 299                  | 157                       | 52.5 | 19.3    | 12                                    | 7.6  | 6.4     |
|                           | $\gamma(1,2,3)::\text{EpGFP}$                 | 390                  | 79                        | 20.3 | 24.0    | 9                                     | 11.4 | 3.0     |
|                           | $\gamma(2)::\text{EpGFP}$                     | 247                  | 114                       | 46.2 | 18.9    | 10                                    | 8.8  | 1.1     |
| Late gastrula (48h)       | $\epsilon\delta\gamma\beta\alpha::\text{GFP}$ | 316                  | 161                       | 50.9 | 17.5    | 48                                    | 29.8 | 8.0     |
|                           | $\alpha\beta\gamma\delta\epsilon::\text{GFP}$ | 76                   | 3                         | 3.9  | 5.4     | 2                                     | 66.7 | 0.7     |
|                           | $\delta\gamma\beta\alpha::\text{GFP}$         | 101                  | 54                        | 53.5 | 13.4    | 35                                    | 64.8 | 17.5    |
|                           | $\gamma\beta\alpha::\text{GFP}$               | 213                  | 191                       | 89.7 | 9.0     | 46                                    | 24.1 | 13.5    |
|                           | $\beta\alpha::\text{GFP}$                     | 213                  | 170                       | 79.8 | 17.3    | 92                                    | 54.1 | 9.8     |
|                           | $\alpha::\text{GFP}$                          | 109                  | 62                        | 56.9 | 16.7    | 20                                    | 32.3 | 2.3     |
|                           | $\gamma(1,2,3)\alpha::\text{GFP}$             | 254                  | 103                       | 40.6 | 10.9    | 64                                    | 62.1 | 10.8    |
|                           | $\gamma(2)\alpha::\text{GFP}$                 | 218                  | 99                        | 45.5 | 15.5    | 52                                    | 52.5 | 6.9     |
|                           | $\gamma(1,2,3)::\text{EpGFP}$                 | 199                  | 67                        | 33.7 | 17.9    | 32                                    | 47.8 | 6.7     |
|                           | $\gamma(2)::\text{EpGFP}$                     | 219                  | 82                        | 37.4 | 14.4    | 20                                    | 24.4 | 9.4     |

Supplemental Table 3. A 71bp fragment of  $\gamma$  (2) sufficient to drive PMC-specific expression contains two functional Ets factor binding sites

| Construct                       | Total embryos scored | GFP+embros (%of total) |      |         | Embryos misexpressinf GFP (% of GFP+) |       |         |
|---------------------------------|----------------------|------------------------|------|---------|---------------------------------------|-------|---------|
|                                 |                      | #                      | %    | SEM (%) | #                                     | %     | SEM (%) |
| $\gamma$ (2)::EpGFP             | 444                  | 173                    | 39.0 | 8.1     | 4                                     | 2.3   | 1.6     |
| $\gamma$ (2.1)::EpGFP           | 140                  | 66                     | 47.1 | 13.6    | 3                                     | 4.5   | 2.3     |
| $\gamma$ (2.2)::EpGFP           | 258                  | 64                     | 24.8 | 10.1    | 0                                     | 0.0   | 0.0     |
| $\gamma$ (2.3)::EpGFP           | 169                  | 12                     | 7.1  | 0.9     | 7                                     | 58.3  | 21.3    |
| $\gamma$ (2.4)::EpGFP           | 241                  | 1                      | 0.4  | 0.0     | 1                                     | 100.0 | 0.0     |
| $\gamma$ (2.2-3)::EpGFP         | 282                  | 63                     | 22.3 | 7.3     | 5                                     | 7.9   | 5.9     |
| $\gamma$ (2)::EpGFP Otxmut      | 268                  | 78                     | 29.1 | 3.5     | 0                                     | 0.0   | 0.0     |
| $\gamma$ (2)::EpGFP ComplexD    | 191                  | 20                     | 10.5 | 9.2     | 0                                     | 0.0   | 0.0     |
| $\gamma$ (2)::EpGFP Etsmut1     | 406                  | 35                     | 8.6  | 5.0     | 3                                     | 8.6   | 0.5     |
| $\gamma$ (2)::EpGFP Etsmut2     | 96                   | 28                     | 29.2 | 11.9    | 3                                     | 10.7  | 3.9     |
| $\gamma$ (2)::EpGFP Etsmut1+2   | 99                   | 3                      | 3.0  | 4.0     | 3                                     | 100.0 | 0.0     |
| $\gamma$ (2)::EpGFP bHLHmut     | 320                  | 161                    | 50.3 | 8.0     | 13                                    | 8.1   | 3.3     |
| $\gamma$ (2)::EpGFP + N MO      | 448                  | 206                    | 46.0 | 12.6    | 3                                     | 1.4   | 2.0     |
| $\gamma$ (2)::EpGFP + Ets1/2 MO | 282                  | 13                     | 4.6  | 7.3     | 2                                     | 0.7   | 10.0    |
| $\gamma$ (2)::EpGFP + Erg MO    | 199                  | 157                    | 78.9 | 0.2     | 48                                    | 24.1  | 0.9     |
| $\gamma$ (2)::EpGFP + Ets4 MO   | 95                   | 59                     | 62.1 | 11.7    | 0                                     | 0.0   | 0.0     |
| $\gamma$ (2)::EpGFP + Elk MO    | 200                  | 47                     | 23.5 | 9.5     | 7                                     | 14.9  | 12.1    |
| $\gamma$ (2)::EpGFP + Tel MO    | 212                  | 57                     | 26.9 | 10.5    | 1                                     | 1.8   | 1.4     |
